# Supplementary material
Source: publisher figshare collection journal article supplement (https://brill.figshare.com/articles/dataset/_/24156075)
Supplement: Supplementary file 1 [file 1]

## Sheet: Table S1
Table S1. Genetic diversity in populations sampled (codes as in Table 1): total number of alleles (NA), mean allelic richness (AR), observed (Ho) and expected (HE) heterozygosity, number of private alleles (PA) and inbreeding coefficient (FIS) calculated by poppr package.
Population	NA	AR	HO	HE	PA	FIS
KAL	71	5071	0.669	0.579	2	-0.1093
CEV	86	6143	0.621	0.641	5	0.1001
IKZ	64	4571	0.621	0.577	4	-0.0240
ALI	77	5500	0.693	0.615	1	-0.0738
GUN1	83	5929	0.749	0.680	2	-0.0459
GUN2	55	3929	0.738	0.643	0	0.0534
SEN	37	2643	0.650	0.475	7	-0.3231
CAT	83	5929	0.636	0.624	1	0.0502
SUC	70	5000	0.655	0.664	0	0.1042
HEM	82	5857	0.720	0.659	2	-0.0377
PAZ	58	4143	0.598	0.533	1	-0.0725
KAP	37	2643	0.650	0.500	0	-0.252
ARD	80	5714	0.643	0.618	4	0.0075
YAY	92	6571	0.681	0.660	0	0.0122
FIN	38	2714	0.643	0.472	3	-0.1739
ORT	79	5643	0.621	0.632	5	0.0695
HOP	36	2571	0.571	0.438	0	0.0303
MUR	84	6000	0.662	0.656	2	0.0442
CFT	36	2571	0.564	0.421	3	-0.2927
AKH	58	4143	0.516	0.544	16	0.0907
BOR	78	5571	0.586	0.531	1	-0.0147
MES	72	5143	0.558	0.546	3	0.0249

## Sheet: Table S2
Table S2. Basic genetic diversity indices for each population (AR: Allelic richness; Ho: Observed heterozygosity; He: Expected heterozygosity; F: Inbreeding coefficient; HPW: Number of loci deviating from Hardy-Weinberg proportions; LD: number of loci in linkage disequilibrium). Indices are calculated by adegenet package.
Population	PopID	Sample Size	Number of Alleles	AR_mean	AR_sdev	Ho_mean	Ho_sdev	He_mean	He_sdev	F_mean	F_sdev	HWP	LD
KAL	1	11	71	5071	2702	0.669	0.320	0.579	0.251	0.131	0.032	0	0
CEV	2	11	86	6143	3159	0.621	0.302	0.641	0.213	0.180	0.073	0	0
IKZ	3	9	64	4571	2709	0.621	0.285	0.577	0.228	0.155	0.049	0	0
ALI	4	10	77	5500	3156	0.693	0.273	0.615	0.234	0.132	0.033	0	0
GUN1	5	10	83	5929	3222	0.749	0.206	0.680	0.163	0.130	0.034	0	0
GUN2	6	3	55	3929	1542	0.738	0.267	0.643	0.183	0.123	0.016	0	0
SEN	7	10	37	2643	1082	0.650	0.380	0.475	0.258	0.117	0.013	0	0
CAT	8	11	83	5929	3339	0.636	0.283	0.624	0.272	0.170	0.075	0	0
SUC	9	6	70	5000	2418	0.655	0.240	0.664	0.205	0.164	0.026	0	0
HEM	10	11	82	5857	3348	0.720	0.240	0.659	0.216	0.131	0.015	0	0
PAZ	11	10	58	4143	1994	0.598	0.372	0.533	0.288	0.150	0.052	0	0
KAP	12	10	37	2643	1008	0.650	0.376	0.500	0.242	0.128	0.040	0	0
ARD	13	11	80	5714	2813	0.643	0.324	0.618	0.296	0.153	0.053	0	0
YAY	14	10	92	6571	3837	0.681	0.293	0.660	0.244	0.150	0.051	0	0
FIN	15	3	38	2714	0.994	0.643	0.402	0.472	0.258	0.115	0.001	0	0
ORT	16	10	79	5643	3225	0.621	0.317	0.632	0.293	0.167	0.054	0	0
HOP	17	2	36	2571	1284	0.571	0.432	0.438	0.321	0.127	0.027	0	0
MUR	18	10	84	6000	3374	0.662	0.282	0.656	0.223	0.155	0.037	0	0
CFT	19	10	36	2571	0.938	0.564	0.359	0.421	0.238	0.146	0.040	0	0
AKH	20	10	58	4143	2476	0.516	0.240	0.544	0.221	0.203	0.040	0	0
BOR	21	12	78	5571	4127	0.586	0.352	0.531	0.307	0.175	0.100	0	0
MES	22	11	72	5143	3085	0.558	0.289	0.546	0.276	0.178	0.056	0	0

## Sheet: Table S3
Table S3. Pairwise estimates of Hedrick’s GST and Jost’s D among sampled populations
G'st_est
	KAL	CEV	IKZ	ALI	GUN1	GUN2	SEN	CAT	SUC	HEM	PAZ	KAP	ARD	YAY	FIN	ORT	HOP	CFT	MUR	AKH	BOR	MES
KAL
CEV	0.1002
IKZ	0.191	0.1439
ALI	0.1423	0.0996	0.1397
GUN1	0.1472	0.0999	0.1651	0.1587
GUN2	0.2015	0.1203	0.2853	0.1095	0.0233
SEN	0.3568	0.2988	0.3452	0.2692	0.352	0.3153
CAT	0.2274	0.1885	0.2105	0.1768	0.252	0.1429	0.2958
SUC	0.21	0.1121	0.2205	0.119	0.1497	-0.0026	0.3221	0.0239
HEM	0.2735	0.1495	0.2658	0.2268	0.2285	0.1457	0.3225	0.1353	0.0432
PAZ	0.4467	0.3378	0.4275	0.3861	0.4586	0.3324	0.3654	0.2494	0.2431	0.2766
KAP	0.4917	0.3442	0.4584	0.4134	0.5262	0.4471	0.4196	0.2819	0.2933	0.3127	0.3242
ARD	0.3089	0.2739	0.3013	0.2495	0.345	0.209	0.3532	0.135	0.1059	0.1935	0.2583	0.2765
YAY	0.219	0.2091	0.2329	0.1926	0.21	0.1393	0.3227	0.1469	0.024	0.1593	0.2948	0.3051	0.0831
FIN	0.5038	0.5209	0.4771	0.5368	0.491	0.3918	0.5455	0.4393	0.3939	0.4391	0.5214	0.5402	0.415	0.2512
ORT	0.3393	0.3821	0.3638	0.3979	0.3438	0.2973	0.4204	0.2662	0.263	0.3065	0.4501	0.4037	0.303	0.1995	0.2889
HOP	0.4476	0.48	0.5052	0.5014	0.4216	0.2918	0.5954	0.4376	0.256	0.3441	0.4241	0.544	0.3006	0.277	0.3859	0.2116
CFT	0.438	0.425	0.4183	0.3715	0.3869	0.3861	0.426	0.3588	0.37	0.3526	0.502	0.5386	0.3258	0.3583	0.6327	0.4982	0.4957
MUR	0.24	0.2524	0.2269	0.2065	0.2348	0.1681	0.3815	0.1886	0.1012	0.205	0.308	0.4057	0.1555	0.0214	0.2838	0.1726	0.1581	0.3496
AKH	0.3771	0.373	0.3577	0.3326	0.3738	0.326	0.3731	0.2999	0.3019	0.3465	0.4838	0.49	0.299	0.2619	0.5424	0.289	0.3942	0.4035	0.1743
BOR	0.3141	0.3206	0.306	0.4093	0.3777	0.3882	0.4022	0.3895	0.3338	0.3062	0.4617	0.4901	0.3563	0.2006	0.3443	0.2446	0.2832	0.5205	0.2011	0.3399
MES	0.381	0.3799	0.3637	0.4214	0.3893	0.4322	0.5179	0.4164	0.3377	0.3223	0.3884	0.5715	0.2945	0.2089	0.4381	0.3285	0.2725	0.4809	0.196	0.3609	0.1326
Djost_est
	KAL	CEV	IKZ	ALI	GUN1	GUN2	SEN	CAT	SUC	HEM	PAZ	KAP	ARD	YAY	FIN	ORT	HOP	CFT	MUR	AKH	BOR	MES
KAL
CEV	0.0429
IKZ	0.1195	0.0305
ALI	0.0946	0.0255	0.0931
GUN	0.0958	0.0509	0.0891	0.0903
GUN	0.0545	-0.0016	0.1425	0.0121	-0.0087
SEN	0.2504	0.1918	0.2041	0.1772	0.2658	0.2034
CAT	0.1474	0.0974	0.1324	0.109	0.1196	0.0036	0.2448
SUC	0.1214	0.0341	0.1515	0.0854	0.0304	-0.0157	0.2043	-1e-04
HEM	0.1783	0.0478	0.1728	0.1689	0.1687	0.0017	0.2406	0.0672	0.0299
PAZ	0.3302	0.2361	0.3162	0.3	0.3302	0.1768	0.2657	0.1602	0.1491	0.1746
KAP	0.3735	0.2407	0.305	0.2599	0.4249	0.3453	0.2845	0.1904	0.2066	0.2223	0.1893
ARD	0.174	0.142	0.2199	0.1816	0.2383	0.0073	0.255	0.0725	0.0227	0.1522	0.1894	0.1625
YAY	0.1212	0.0889	0.1317	0.0986	0.1211	-0.0023	0.2488	0.0502	0	0.056	0.1937	0.1637	0.0131
FIN	0.1944	0.3137	0.2474	0.3082	0.2682	0.105	0.3499	0.25	0.2007	0.2274	0.343	0.3779	0.1825	0.0621
ORT	0.2542	0.287	0.2902	0.2625	0.2686	0.0055	0.337	0.1903	0.1898	0.2358	0.4138	0.3332	0.2121	0.13	0.1764
HOP	0.3508	0.2684	0.3231	0.2925	0.0082	NaN	0.375	0.0381	-0.009	0.1608	0.1591	0.374	0.0167	0.0037	0.0375	0.0051
CFT	0.2616	0.2594	0.2542	0.2121	0.2116	0.2267	0.2429	0.1852	0.2401	0.2133	0.3453	0.3192	0.1954	0.1682	0.3226	0.3645	0.2693
MUR	0.157	0.135	0.1572	0.1134	0.1064	0.0022	0.3116	0.0954	0.026	0.1431	0.178	0.2809	0.0928	0.0043	0.1248	0.0648	-2e-04	0.1707
AKH	0.286	0.241	0.2396	0.2081	0.2323	0.1509	0.2365	0.1996	0.2087	0.2574	0.3902	0.3653	0.2563	0.1963	0.3085	0.2098	0.1139	0.1943	0.1052
BOR	0.2445	0.2136	0.2032	0.2747	0.2516	0.0893	0.2999	0.2871	0.226	0.2178	0.4263	0.3819	0.3167	0.1559	0.109	0.0885	0.0221	0.3483	0.1372	0.2338
MES	0.2886	0.2913	0.2333	0.332	0.2816	0.1222	0.3606	0.2438	0.2279	0.2056	0.2579	0.457	0.2052	0.0491	0.1899	0.2195	0.0755	0.2551	0.109	0.2159	0.0821

## Sheet: Table S4
Table S4. Pairwise Fst estimates among sampled populations (lower diagonal) and their associated p-values (upper diagonal).
	KAL	CEV	IKZ	ALI	GUN1	GUN2	SEN	CAT	SUC	HEM	PAZ	KAP	ARD	YAY	FIN	ORT	HOP	MUR	CFT	AKH	BOR	MES
KAL		0.009	0.000	0.000	0.000	0.000	0.000	0.000	0.000	0.000	0.000	0.000	0.000	0.000	0.000	0.000	0.009	0.000	0.000	0.000	0.000	0.000
CEV	0.043		0.000	0.009	0.000	0.081	0.000	0.000	0.027	0.000	0.000	0.000	0.000	0.000	0.000	0.000	0.036	0.000	0.000	0.000	0.000	0.000
IKZ	0.092	0.058		0.000	0.000	0.000	0.000	0.000	0.000	0.000	0.000	0.000	0.000	0.000	0.009	0.000	0.045	0.000	0.000	0.000	0.000	0.000
ALI	0.068	0.039	0.064		0.000	0.054	0.000	0.000	0.009	0.000	0.000	0.000	0.000	0.000	0.000	0.000	0.000	0.000	0.000	0.000	0.000	0.000
GUN1	0.062	0.035	0.066	0.061		0.261	0.000	0.000	0.000	0.000	0.000	0.000	0.000	0.000	0.000	0.000	0.072	0.000	0.000	0.000	0.000	0.000
GUN2	0.092	0.036	0.112	0.049	0.012		0.000	0.000	0.585	0.027	0.000	0.090	0.000	0.027	0.909	0.018	0.189	0.045	0.009	0.018	0.009	0.000
SEN	0.193	0.148	0.188	0.144	0.166	0.180		0.000	0.000	0.000	0.000	0.000	0.000	0.000	0.000	0.000	0.027	0.000	0.000	0.000	0.000	0.000
CAT	0.100	0.071	0.089	0.073	0.091	0.051	0.151		0.306	0.000	0.000	0.000	0.000	0.000	0.000	0.000	0.018	0.000	0.000	0.000	0.000	0.000
SUC	0.087	0.034	0.084	0.045	0.047	0.000	0.161	0.006		0.135	0.000	0.000	0.009	0.225	0.009	0.000	0.090	0.090	0.000	0.000	0.000	0.000
HEM	0.113	0.054	0.107	0.088	0.079	0.052	0.157	0.052	0.015		0.000	0.000	0.000	0.000	0.000	0.000	0.018	0.000	0.000	0.000	0.000	0.000
PAZ	0.214	0.147	0.203	0.177	0.186	0.149	0.210	0.115	0.105	0.121		0.000	0.000	0.000	0.000	0.000	0.036	0.000	0.000	0.000	0.000	0.000
KAP	0.246	0.161	0.230	0.201	0.225	0.217	0.249	0.139	0.140	0.146	0.182		0.000	0.000	0.000	0.000	0.009	0.000	0.000	0.000	0.000	0.000
ARD	0.134	0.104	0.128	0.103	0.124	0.076	0.179	0.055	0.038	0.075	0.120	0.138		0.000	0.018	0.000	0.000	0.000	0.000	0.000	0.000	0.000
YAY	0.091	0.073	0.092	0.074	0.071	0.044	0.156	0.054	0.005	0.057	0.127	0.142	0.032		0.009	0.009	0.054	0.243	0.000	0.000	0.000	0.000
FIN	0.237	0.201	0.219	0.230	0.184	0.151	0.317	0.182	0.141	0.174	0.262	0.298	0.177	0.098		0.000	0.189	0.000	0.009	0.000	0.000	0.009
ORT	0.142	0.137	0.147	0.152	0.118	0.095	0.204	0.101	0.087	0.111	0.194	0.189	0.117	0.071	0.116		0.027	0.018	0.000	0.000	0.000	0.000
HOP	0.211	0.173	0.222	0.210	0.151	0.084	0.344	0.172	0.071	0.132	0.217	0.303	0.123	0.098	0.210	0.074		0.054	0.009	0.036	0.018	0.180
MUR	0.099	0.088	0.090	0.079	0.079	0.051	0.181	0.069	0.030	0.072	0.133	0.183	0.059	0.006	0.109	0.061	0.049		0.000	0.000	0.000	0.000
CFT	0.245	0.217	0.237	0.204	0.193	0.230	0.277	0.192	0.196	0.181	0.291	0.325	0.178	0.184	0.383	0.253	0.329	0.180		0.000	0.000	0.000
AKH	0.178	0.154	0.166	0.148	0.149	0.130	0.207	0.130	0.119	0.143	0.235	0.251	0.132	0.107	0.253	0.123	0.179	0.072	0.235		0.000	0.000
BOR	0.156	0.142	0.151	0.187	0.158	0.172	0.226	0.175	0.143	0.134	0.233	0.259	0.163	0.089	0.184	0.111	0.153	0.089	0.299	0.171		0.000
MES	0.181	0.160	0.171	0.187	0.157	0.176	0.274	0.180	0.138	0.136	0.195	0.288	0.133	0.089	0.215	0.142	0.134	0.084	0.274	0.176	0.071

## Sheet: Table S5
Table S5. Output of Structure Harvester showing the likelihood and delta(likelihood) values for each number of predefined genetic clusters (K). K=2 (yellow) represents the value of K best describing the data according to Evanno's delta(k) method
# K	Reps	Mean LnP(K)	Stdev LnP(K)	Ln'(K)	|Ln''(K)|	Delta K
1	10	-9263.7000	0.9321	NA	NA	NA
2	10	-8935.0700	0.7103	328.630000	75.860000	106.796825
3	10	-8682.3000	0.7424	252.770000	72.900000	98.199199
4	10	-8502.4300	18.8123	179.870000	64.790000	3.444025
5	10	-8387.3500	60.2470	115.080000	60.330000	1.001377
6	10	-8332.6000	4.5274	54.750000	4.910000	1.084496
7	10	-8272.9400	13.8025	59.660000	6.020000	0.436152
8	10	-8207.2600	7.9850	65.680000	6.780000	0.849091
9	10	-8148.3600	4.9318	58.900000	3.870000	0.784703
10	10	-8093.3300	3.3879	55.030000	NA	NA

## Sheet: Table S6
Table S6. Ancestry coefficients of each individual based on Structure results at K=2. V1 = B.bufo cluster and V2 = B. verrucosissimus cluster. Population-averaged assignment probabilities to cluster V1 (B. bufo) are shown following a west-east transect.
Individual Scores							Population Means (Q Score)
Ind	V1	V2
KAL01	0.936	0.064		KAL	CEV	IKZ	ALI	GUN1	GUN2	SEN	CAT	SUC	HEM	PAZ
KAL02	0.946	0.054		0.944182	0.977545	0.859556	0.999	0.9777	0.947	0.9075	0.851818	0.8045	0.804909	0.7858
KAL03	0.946	0.054		KAP	ARD	YAY	FIN	ORT	HOP	MUR	CFT	AKH	BOR	MES
KAL04	0.955	0.045		0.7774	0.621182	0.471	0.260333	0.1237	0.08	0.4081	0.6606	0.3037	1.00E-03	0.035
KAL05	0.939	0.061
KAL06	0.941	0.059
KAL07	0.948	0.052
KAL08	0.945	0.055
KAL09	0.946	0.054
KAL10	0.942	0.058
KAL11	0.942	0.058
CEV01	0.978	0.022
CEV02	0.977	0.023
CEV03	0.977	0.023
CEV04	0.975	0.025
CEV05	0.974	0.026
CEV06	0.976	0.024
CEV07	0.981	0.019
CEV08	0.981	0.019
CEV09	0.982	0.018
CEV10	0.981	0.019
YOLBASI	0.971	0.029
IKZ01	0.862	0.138
IKZ02	0.865	0.135
IKZ03	0.86	0.14
IKZ04	0.853	0.147
IKZ06	0.86	0.14
IKZ07	0.86	0.14
IKZ08	0.858	0.142
IKZ09	0.857	0.143
IKZ10	0.861	0.139
ALI01	0.999	0.001
ALI02	0.999	0.001
ALI03	0.999	0.001
ALI04	0.999	0.001
ALI05	0.999	0.001
ALI06	0.999	0.001
ALI07	0.999	0.001
ALI08	0.999	0.001
ALI09	0.999	0.001
ALI10	0.999	0.001
GUN01	0.976	0.024
GUN05	0.983	0.017
GUN06	0.976	0.024
GUN07	0.973	0.027
GUN08	0.982	0.018
GUN09	0.99	0.01
GUN10	0.981	0.019
GUN11	0.97	0.03
GUN12	0.978	0.022
GUN13	0.968	0.032
GUN02	0.943	0.057
GUN03	0.943	0.057
GUN04	0.955	0.045
SEN02	0.899	0.101
SEN09	0.916	0.084
CAT01	0.85	0.15
CAT02	0.851	0.149
CAT03	0.861	0.139
CAT04	0.849	0.151
CAT05	0.852	0.148
CAT06	0.845	0.155
CAT07	0.851	0.149
CAT08	0.85	0.15
CAT09	0.848	0.152
CAT10	0.856	0.144
GITO	0.857	0.143
SUC01	0.805	0.195
SUC02	0.797	0.203
SUC03	0.807	0.193
SUC04	0.804	0.196
SUC05	0.806	0.194
SUC06	0.808	0.192
HEM01	0.804	0.196
HEM02	0.803	0.197
HEM03	0.804	0.196
HEM04	0.806	0.194
HEM05	0.806	0.194
HEM06	0.808	0.192
HEM07	0.807	0.193
HEM08	0.804	0.196
HEM09	0.803	0.197
HEM10	0.806	0.194
HEM11	0.803	0.197
PAZ02	0.777	0.223
PAZ03	0.781	0.219
PAZ04	0.783	0.217
PAZ06	0.796	0.204
PAZ10	0.792	0.208
KAP01	0.781	0.219
KAP02	0.777	0.223
KAP03	0.772	0.228
KAP04	0.779	0.221
KAP05	0.778	0.222
ARD01	0.62	0.38
ARD02	0.623	0.377
ARD03	0.618	0.382
ARD04	0.621	0.379
ARD05	0.621	0.379
ARD06	0.622	0.378
ARD07	0.622	0.378
ARD08	0.623	0.377
ARD09	0.618	0.382
ARD10	0.619	0.381
ARD11	0.626	0.374
YAY01	0.471	0.529
YAY02	0.466	0.534
YAY03	0.475	0.525
YAY04	0.478	0.522
YAY05	0.47	0.53
YAY06	0.463	0.537
YAY07	0.478	0.522
YAY08	0.47	0.53
YAY09	0.467	0.533
YAY10	0.472	0.528
FIN01	0.253	0.747
FIN02	0.257	0.743
FIN03	0.271	0.729
ORT01	0.126	0.874
ORT02	0.121	0.879
ORT03	0.128	0.872
ORT04	0.125	0.875
ORT05	0.128	0.872
ORT06	0.122	0.878
ORT07	0.119	0.881
ORT08	0.124	0.876
ORT09	0.122	0.878
ORT10	0.122	0.878
HOP01	0.08	0.92
HOP02	0.08	0.92
MUR01	0.413	0.587
MUR02	0.408	0.592
MUR03	0.404	0.596
MUR04	0.405	0.595
MUR05	0.409	0.591
MUR06	0.409	0.591
MUR07	0.403	0.597
MUR08	0.409	0.591
MUR09	0.412	0.588
MUR10	0.409	0.591
CFT01	0.659	0.341
CFT02	0.661	0.339
CFT03	0.656	0.344
CFT04	0.66	0.34
CFT05	0.659	0.341
CFT06	0.667	0.333
CFT07	0.668	0.332
CFT08	0.657	0.343
CFT09	0.666	0.334
CFT10	0.653	0.347
AKH01	0.306	0.694
AKH02	0.303	0.697
AKH03	0.303	0.697
AKH04	0.304	0.696
AKH05	0.3	0.7
AKH06	0.305	0.695
AKH07	0.301	0.699
AKH08	0.309	0.691
AKH09	0.303	0.697
AKH10	0.303	0.697
ART07	0.001	0.999
ART08	0.001	0.999
ART09	0.001	0.999
ART11	0.001	0.999
ART12	0.001	0.999
BOR01	0.001	0.999
BOR02	0.001	0.999
BOR03	0.001	0.999
BOR04	0.001	0.999
BOR05	0.001	0.999
BOR06	0.001	0.999
BOR07	0.001	0.999
MES01	0.035	0.965
MES02	0.035	0.965
MES03	0.035	0.965
MES04	0.037	0.963
MES05	0.036	0.964
MES07	0.035	0.965
MES08	0.032	0.968
MES10	0.034	0.966
MES11	0.033	0.967
SAV01	0.036	0.964
SAV02	0.037	0.963

## Sheet: Table S7
Table S7. PCA loadings of each individual at the first three PCA components. Mean centroid scores for all population in PC1 are also presented (see Figure S1).
Ind.	Axis1	Axis2	Axis3						Population Scores (Mean Centroid)
KAL01	0.339033347908572	1.07780928975742	-2.0922446665131
KAL02	-0.349974099324889	5.46526880357781	-2.82515060575995			KAL	CEV	IKZ	ALI	GUN1	GUN2	SEN	CAT	SUC	HEM	PAZ
KAL03	-0.689852407188602	3.86443784959137	-1.68209832904794			-0.26317775	-1.18228365	0.01823141	-1.63777112	-0.22812305	-0.67060175	-3.06159432	-1.59879033	-0.86345949	-1.11563690	-2.34382029
KAL04	-1.21135954167165	3.06292011804827	-1.81515977648109			KAP	ARD	YAY	FIN	ORT	HOP	MUR	CFT	AKH	BOR	MES
KAL05	-0.474582686107522	3.11900298543148	-2.89417907714254			-4.00317316	-0.96012454	0.67047998	2.53455675	2.49710492	3.09692116	1.82802972	-0.86500007	4.42068204	3.11282515	3.58446032
KAL06	0.00839630535668399	1.28449325884222	-1.03560424481838
KAL07	0.00900582773824805	5.49588220111192	-0.83743139322027
KAL08	-0.757257027462647	5.71292174835165	-2.40929514171061
KAL09	-0.645834387894086	2.23136038665484	-1.17496603688126
KAL10	0.406385937312168	5.54331624011186	-2.49282309960014
KAL11	0.4710834381097	3.53631812298304	-2.72732261846501
CEV01	0.906957881179704	5.50135155231047	-2.91395269626521
CEV02	-1.96605230383869	1.33043743496562	-0.0493322114993121
CEV03	-3.57501324715001	1.09284489703751	-0.125640027831611
CEV04	-1.14320595271041	3.18026307070829	2.10118130976561
CEV05	-0.772821752273	2.37926110794929	-1.27747365627175
CEV06	-3.07541806116519	0.687266336620451	0.378961458965529
CEV07	-1.46809938249521	2.85283446956621	-0.55657082482011
CEV08	-0.968591404427902	4.20416731605126	-1.28139534150943
CEV09	-0.358613555117795	2.92394666383711	-0.489995659126628
CEV10	-0.448536718092083	2.48859487863145	-1.24788788491528
YOLBASI	-0.135725660026176	0.72112329257041	-0.332044598699776
IKZ01	-0.951999494138279	2.79746118686004	-0.591752547860038
IKZ02	-1.23084960342766	1.6957366549005	0.748603239985451
IKZ03	-1.01164056754737	2.48165221726759	-0.828721628873822
IKZ04	2.73450492771302	4.56773878083156	-2.05006154863189
IKZ06	0.22921257245939	2.56320299841498	-2.48577135755899
IKZ07	-0.744245244813735	1.88126327661507	-1.30987000424146
IKZ08	1.20235012114311	2.17197850134148	-0.635689894158175
IKZ09	0.436799225317869	2.13006974344625	-1.60517538190848
IKZ10	-0.500049250801356	2.50302424232767	-0.362973977211042
ALI01	-0.131590796981445	1.80873784302797	-1.04574840572151
ALI02	-0.841670974952741	1.94177493194673	-0.855140453511619
ALI03	-1.58600905505912	2.6833052270152	-0.110421258326118
ALI04	-1.46138164151735	1.58741890800522	0.87983201416827
ALI05	-3.16723669900697	5.14658303283559	1.19555859217102
ALI06	-0.600556950524192	2.0092740057918	0.865906537579255
ALI07	-1.58688448721492	4.43860512872884	2.09195988660255
ALI08	-2.27733280036525	2.81039260384171	1.06564567726485
ALI09	-2.99276194044711	3.14699878606003	0.628586269030184
ALI10	-1.73228582896682	3.62429733663945	-1.09158151767797
GUN01	0.0338297669669566	2.80843669944442	-1.67794998371557
GUN05	-2.93524767674934	3.57183653242512	1.18089437226017
GUN06	-0.228092966723086	4.29005098595269	0.119206578828599
GUN07	1.63505317458676	2.20796462259185	-1.403090951824
GUN08	-0.446846507995735	5.75945177774539	-0.171039099657494
GUN09	-2.03959421269294	5.81350850468362	-1.46178337191272
GUN10	-0.877785218618598	3.29563710168609	0.0475879110648865
GUN11	1.22612709772198	0.930806198134838	-1.64930910935162
GUN12	0.834370860163586	4.16912734043876	1.20375997156255
GUN13	0.516955152352459	0.265341182876827	-1.93303651617253
GUN02	1.94252032868627	1.86711206510989	-1.85528813812766
GUN03	-0.956536970923135	1.94421590562008	0.135167872786544
GUN04	-2.99778860245912	1.70956900281057	0.0795633159651218
SEN01	-3.55701100408467	0.00171980625207602	2.14647127259082
SEN02	-3.1056359887616	-0.38172455800587	1.52654613132636
SEN03	-3.06803664667947	0.459252240472971	1.42518134959503
SEN04	-3.35923942506599	-0.616368147042493	1.92209945660863
SEN05	-3.02199579768138	-0.00687461488448889	1.76530779031178
SEN06	-2.79410211624342	0.428168061377713	2.19326031461299
SEN07	-2.84046075117281	-0.579769126788998	1.8034626029693
SEN08	-2.72825570180378	1.02439344382128	2.56708368536971
SEN09	-2.97600485338581	0.678642851234256	2.49139442328719
SEN10	-3.16520088029248	-0.985624420356171	1.00182581266669
CAT01	-0.631245678063029	1.70148767419776	-0.0953592001589005
CAT02	-1.41972118013838	-0.0670803973765927	0.291890175978081
CAT03	-4.56438949300164	0.331158840314946	-0.736846899763733
CAT04	-1.45530884209773	-0.54354987889452	-0.460169538040921
CAT05	-1.68674485828825	0.179765269057471	-0.551333953438972
CAT06	-0.446426623275101	-0.701983557253238	-0.922267748169522
CAT07	-1.2492715283203	-1.74681897037616	0.36251041198091
CAT08	-2.09599294696286	-0.466378496496118	-0.0944521148067593
CAT09	-0.330803579942572	-1.70921131214102	-0.867774960446614
CAT10	-0.91400314933237	2.26327134204297	-1.33911077582457
GITO	-2.79278569900546	-1.03422751585438	0.286016144854636
SUC01	-2.2293110362419	-0.610361668462637	1.02198563700188
SUC02	0.42173582662655	-0.644011158131909	-1.04080322116354
SUC03	-1.39564802727086	-0.16682212088721	-1.30685004554196
SUC04	-0.838960101707578	0.561468833384032	0.686042608424065
SUC05	-0.106520738934564	3.68492583302566	-0.0210200731753744
SUC06	-1.03205284330879	-0.255605803467143	-0.875486695947378
HEM01	0.247548167275699	0.523383315344775	-1.56376472918181
HEM02	-1.10713961334084	0.84066677439559	0.286023058534104
HEM03	-0.0423644082630899	0.133043541251618	-0.625812452345147
HEM04	-0.33065751313712	0.583470727118789	1.42425123283302
HEM05	-1.96350435503539	0.416942093121928	-0.870772541862666
HEM06	-3.75671952278379	0.245803595305933	-0.848406861487124
HEM07	-0.206966840257755	1.62625211524857	0.126208121330619
HEM08	-1.34289103332698	-2.71616991862479	-4.43500781418008
HEM09	-1.52865593504295	-2.84881036741423	-3.18643242105049
HEM10	-1.45194946932633	-0.168671151094193	-0.472134147213317
HEM11	-0.788705343397442	-1.45025339412519	-2.3509338378459
PAZ01	-3.21797104325481	-3.67399503524652	-0.283460998236565
PAZ02	1.5490239528945	-1.72976865574709	-0.824078617743294
PAZ03	0.917267781518189	-0.625296306594583	-1.11975145699328
PAZ04	-0.836856971553207	-1.16806711353353	-1.14297612255881
PAZ05	-4.32163434716278	-2.50860160428465	-0.969381542927189
PAZ06	-3.54651502517644	-1.41221098409616	-0.365779960578137
PAZ07	-3.16684541087168	-1.18950074808026	-0.48821241352228
PAZ08	-3.78426549179848	-4.299325294017	-1.11523700093399
PAZ09	-3.80967064973284	-2.85314763881651	-1.08822871646114
PAZ10	-3.22073569997954	-2.51226753575354	-0.158400620547368
KAP01	-4.22370148694333	-3.87589368139976	2.19022083800582
KAP02	-3.29589649658973	-5.17292808474922	1.78509863212932
KAP03	-4.00117111507528	-4.80754846347041	1.08833022434088
KAP04	-3.87362687276254	-3.80780127616932	2.38430890098238
KAP05	-4.07185712682692	-3.97758021730887	1.35568005362267
KAP06	-4.92795666022969	-3.47011736883004	1.07826179058115
KAP07	-3.63689997479378	-4.21793456121636	1.62814486706399
KAP08	-4.48503354856254	-3.47327435983844	1.04239838302673
KAP09	-3.28618202649024	-5.1938108407498	2.31366250678514
KAP10	-4.2294063141728	-3.97916976708386	2.39354458014888
ARD01	-1.07323350207713	-1.08614406774384	2.24261739176512
ARD02	-1.81700303162697	-2.28761842843731	1.32302134261324
ARD03	-0.885528951473905	-1.69850054606282	2.72988345467466
ARD04	0.0143231106138861	-0.955028488160441	-1.69178633130385
ARD05	-0.43748966580981	-1.75401700840709	0.575894338514743
ARD06	-1.30221417845248	-1.37843985945213	-0.274716303724035
ARD07	-0.891712241449704	-1.55972809590994	0.533921158967947
ARD08	-1.45946534548679	-0.999914145769288	0.778976038488602
ARD09	-0.282950552314958	-1.6922002322569	-0.0678313205952648
ARD10	-0.569921487730096	-1.37359297901557	1.24027363082743
ARD11	-1.85617411942973	-0.857310105509784	0.118363372277311
YAY01	-0.559065641113085	-1.12937718396116	0.848167023537827
YAY02	1.06517020843458	-0.955622908682853	-0.552774032446594
YAY03	1.11635558301256	-0.674415985509498	0.765062238191844
YAY04	-0.803025401418472	0.339500056138423	-0.407253758051456
YAY05	1.20410323720238	-2.5944285245008	-0.00809994912769951
YAY06	2.74009030548891	-2.70488141856304	-2.2615290413038
YAY07	0.0780392886275744	1.65967246435224	1.07134729248053
YAY08	0.523023717338647	-0.30017958107981	0.0475251907458591
YAY09	2.29930182835285	-0.0355638713485714	-1.4456558748694
YAY10	-0.959193301924793	-3.02161156970349	0.249600514251883
FIN01	3.78536641244181	-2.50900125778467	-4.27688200238318
FIN02	3.30461888716117	-2.06898333554615	-3.29774576100744
FIN03	0.513684939033419	-1.61013466252023	-1.67447281836942
ORT01	2.32483591361265	-3.03146431443869	-0.599347339787997
ORT02	4.38178404180431	-1.99137353736753	-3.67135591582297
ORT03	1.9506128093608	-3.19116723833267	-1.21403651153941
ORT04	0.686919311238744	-2.16195622091046	-0.194192273564992
ORT05	1.91304731348635	-0.541247715955976	2.36956869677757
ORT06	2.07915889678324	-3.63958447164383	1.09458665698101
ORT07	3.50667470728725	-2.22217072594742	-3.06427079775551
ORT08	2.03799548320567	-2.7069022381562	-1.73942553035031
ORT09	3.84107199898596	-3.07094893258487	-2.29621326265734
ORT10	2.24894873726705	-2.34054646720667	-2.13566337907543
HOP01	2.24326431740523	-3.00828450538768	-1.07706784373981
HOP02	3.95057800626111	-2.34463691464908	-1.86848783682283
MUR01	1.13983069376278	1.3046605755955	3.28010083132695
MUR02	1.63696187417979	-1.22826559550793	-0.383452448003626
MUR03	1.86178334353997	-1.0072867036372	-0.406084780224969
MUR04	1.42411261047823	-2.54190258953225	-0.453991543737223
MUR05	2.85343730390472	0.774798447188524	1.23007833644796
MUR06	1.78744712957291	-0.758380549695392	-0.460925084053028
MUR07	2.57328855474725	-1.68127154010445	0.106532349617329
MUR08	1.48629058479991	0.782405186569886	0.63380086733591
MUR09	2.43393932587511	0.146277053255532	-1.2281066772452
MUR10	1.08320576191339	-0.161778050581095	-2.22804873875022
CFT01	0.190138056677861	-0.730199409939629	1.93487931439758
CFT02	-0.786738998525798	-0.581837982074169	2.38509069434662
CFT03	-0.70450455306719	-0.602273591444271	0.932686495927452
CFT04	-0.883246271200415	-0.579876319500809	1.66896844675154
CFT05	-1.27520238879219	-1.10776778857232	1.76141098337891
CFT06	-1.63932845948745	0.240278704566753	2.4381004465199
CFT07	-1.70631273670017	0.418746793580042	1.50367237055653
CFT08	-0.846824986781145	-0.749600032513794	1.35602503945115
CFT09	-0.954038449333745	-0.00770493368556114	1.88009706977432
CFT10	-0.0439419564307365	-1.51109554462382	1.6937262273924
AKH01	3.30698081772365	-0.209769045840652	1.80227658826588
AKH02	2.11143057420878	-2.48688351949343	1.10558909666545
AKH03	5.0793259056639	1.22184023828325	8.98812320733662
AKH04	3.25713447035464	-0.613399487331899	2.21712553803561
AKH05	6.46810391694474	2.07273510794281	10.5327667197843
AKH06	6.16153346309302	1.9187106900479	11.5330960238493
AKH07	6.22241888892777	0.79641062906786	6.09483050915023
AKH08	1.90739507741638	1.04622643588347	6.43014951548054
AKH09	6.79851792987852	1.5099943134919	11.2457102421891
AKH10	2.89397930724621	-0.765845575119509	4.69907201438592
ART07	3.83162855446109	-0.787547273401806	-1.07301040948254
ART08	5.37542542736011	0.0374420323600691	-3.66671610423458
ART09	2.99070364029853	0.0553285499423057	-3.14333480791416
ART11	5.02205590447079	-0.227946297201673	-0.911384256446049
ART12	2.31557946774273	-2.55787010741758	-1.75235728464449
BOR01	2.79330640770889	-1.8435522986973	-1.27587477177672
BOR02	1.8293655378301	-1.76517673384479	-1.47889313078714
BOR03	2.48834800527377	-1.24430570171891	-0.96104036854977
BOR04	2.93432352954796	-2.02372097292337	-0.444423097127148
BOR05	2.15079349088916	-1.20354387274529	-0.452237661872345
BOR06	2.60698328011607	-0.938297364062791	-1.15288407470793
BOR07	3.01538856421784	-0.984618819271563	-1.86292817690829
MES01	4.29664506217717	-0.221064716342274	-0.847227179244984
MES02	5.11594036316403	-1.70743421736142	-1.98784194931497
MES03	4.09174855397321	-1.99799733579295	-2.10326478619859
MES04	1.9803278241199	-0.767037859369937	-1.09930500253445
MES05	4.24125112815992	-1.00244733083675	-2.94138963475543
MES07	4.05224357690619	-0.927540419980897	-1.5706337633116
MES08	4.63868365172906	-1.24279575398583	-1.04586579549212
MES10	4.42146797760488	-1.13922977723328	0.724361768797055
MES11	2.62362188894688	-0.804980896746089	-1.93797985955694
SAV01	2.03505503532825	-0.924785099748846	-1.05719276566145
SAV02	1.93207847607657	-1.60467422431132	-2.12628249721993

## Sheet: Table S8
Table S8. PCA loadings of each individual at the first three PCA components based on Structure results (Bb=B. bufo; Bv=B. verrucosissimus). Mean centroid scores for each group in PC1 are also presented (see Figure 1).
Ind.	Axis1	Axis2	Axis3						Group Scores (Mean Centroid)
Bb	0.339879874439581	1.08050045322193	-2.09746875620957
Bb	-0.350847943629793	5.47891493918617	-2.8322046756815							Bb	Hybrid	Bv
Bb	-0.691574887790487	3.87408689794395	-1.68629833141378							-1.4352287	0.6721541	2.4972292
Bb	-1.21438416446153	3.07056787057256	-1.81969201768479
Bb	-0.475767663448027	3.12679077030204	-2.90140550306616
Bb	0.00841726994701567	1.28770048795174	-1.03819002723263
Bb	0.00902831423453129	5.5096047747857	-0.839522361252329
Bb	-0.759147809500734	5.72718624433526	-2.41531086928161
Bb	-0.647446960661226	2.23693183199848	-1.17789978935545
Bb	0.407400635364408	5.55715725102118	-2.49904738669154
Bb	0.472259678238112	3.5451478948378	-2.73413242336887
Bb	0.909222448702823	5.51508778231311	-2.92122849459811
Bb	-1.97096130599679	1.33375938129773	-0.049455388249121
Bb	-3.58393963619431	1.09557360265107	-0.125953736254624
Bb	-1.14606040397706	3.18820381483141	2.10642771321275
Bb	-0.774751397604574	2.38520184405828	-1.28066335825646
Bb	-3.08309701958855	0.688982360107258	0.379907681309783
Bb	-1.47176505457468	2.85995766285077	-0.557960516933018
Bb	-0.971009863634385	4.21466462906129	-1.28459483548252
Bb	-0.35950897113117	2.93124741593558	-0.491219120854209
Bb	-0.44965666170335	2.49480860835063	-1.25100371469672
Bb	-0.136064551090609	0.722923852907777	-0.33287367514318
Bb	-0.954376525289538	2.80444611954809	-0.593230084611668
Bb	-1.23392289061729	1.6999707105674	0.750472414530528
Bb	-1.0141665154683	2.4878486119751	-0.830790849645157
Bb	2.74133266600119	4.57914388917426	-2.05518031202738
Bb	0.229784889386395	2.5696030158643	-2.49197803727702
Bb	-0.746103537955689	1.88596057051047	-1.31314059610981
Bb	1.20535224846595	2.17740167707776	-0.637277137313532
Bb	0.437889861785456	2.13538827792626	-1.60918331669158
Bb	-0.501297815168917	2.50927400047671	-0.363880280687312
Bb	-0.131919363777507	1.81325404941654	-1.04835951691653
Bb	-0.843772528723403	1.94662331635281	-0.857275638991476
Bb	-1.58996913377058	2.69000512565195	-0.1106969672655
Bb	-1.465030540185	1.59138250695424	0.882028851580915
Bb	-3.17514491780677	5.15943344742818	1.19854376184202
Bb	-0.602056470837271	2.01429092747358	0.868068604709087
Bb	-1.59084675177786	4.44968780547825	2.09718326523692
Bb	-2.28301903343742	2.81740982476225	1.06830646961467
Bb	-3.0002345162253	3.15485647316335	0.630155775266178
Bb	-1.73661114363736	3.63334678227852	-1.09430706878137
Bb	0.0339142359298257	2.81544903670092	-1.68213962814934
Bb	-2.94257664615244	3.5807549895851	1.18384292709288
Bb	-0.228662488125795	4.30076274041988	0.119504223683477
Bb	1.63913571071614	2.21347765145489	-1.40659430547186
Bb	-0.447962231350495	5.77383245375854	-0.171466164241574
Bb	-2.04468684037747	5.82802415400784	-1.46543327365412
Bb	-0.879976945422673	3.30386592124135	0.0477067325009291
Bb	1.22918859336838	0.933130312110077	-1.65342724087915
Bb	0.836454186403284	4.1795371627368	1.2067656191166
Bb	0.518245928774622	0.266003708709335	-1.93786308177867
Bb	1.94737057426064	1.87177402508884	-1.85992057514686
Bb	-0.958925331622077	1.94907038485131	0.135505371121602
Bb	-3.00527372922317	1.71383759622888	0.0797619762393107
Bb	-3.5658924436381	0.00172410040672491	2.15183075976665
Bb	-3.11339039780827	-0.382677679484564	1.53035773808702
Bb	-3.07569717457604	0.460398939487653	1.42873986037686
Bb	-3.36762705216779	-0.617907146060005	1.92689871365899
Bb	-3.02954136697454	-0.006891779992057	1.76971555694924
Bb	-2.80107866172586	0.429237146840627	2.19873662854253
Bb	-2.84755304873289	-0.581216742342773	1.80796563770176
Bb	-2.73506783650735	1.0269512341795	2.5734933924395
Bb	-2.98343558868174	0.680337342888839	2.49761514314124
Bb	-3.17310401589159	-0.988085409006951	1.00432725429509
Bb	-0.63282182453169	1.70573608948575	-0.0955973009044849
Bb	-1.42326605751706	-0.0672478892662271	0.292618991534524
Bb	-4.57578623856522	0.331985705123479	-0.73868672010527
Bb	-1.45894257769704	-0.544907059231645	-0.461318527440091
Bb	-1.69095646249295	0.18021412186369	-0.552710569697847
Bb	-0.447541298226939	-0.703736327914929	-0.924570542636001
Bb	-1.25239081289712	-1.75118057259734	0.363415557989136
Bb	-2.10122639567626	-0.467542988936795	-0.0946879506665236
Bb	-0.331629557707599	-1.71347901244766	-0.869941692809346
Bb	-0.916285308064265	2.26892246530187	-1.34245437847219
Bb	-2.79975895754836	-1.03680986073777	0.286730293643877
Bb	-2.23487736459777	-0.611885670007171	1.02453741534867
Bb	0.422788851553208	-0.645619178508047	-1.04340198481233
Bb	-1.3991327968085	-0.167238656169541	-1.3101130969274
Bb	-0.841054886745492	0.562870755250201	0.68775557640499
Bb	-0.10678670873419	3.69412666091382	-0.0210725578343176
Bb	-1.03462975828974	-0.256244021198386	-0.877672683609754
Bb	0.248166266033811	0.524690142136469	-1.56766926641886
Bb	-1.10990401118549	0.842765820795177	0.286737224585967
Bb	-0.0424701872249166	0.133375735379842	-0.627375032686034
Bb	-0.331483126190451	0.584927585134734	1.4278074212223
Bb	-1.96840699526398	0.417983148657909	-0.872946758834855
Bb	-3.76609961110022	0.246417338072322	-0.850525233976938
Bb	-0.207483612198915	1.63031267616436	0.126523248216482
Bb	-1.34624407483448	-2.72295187654438	-4.44608150885668
Bb	-1.53247280973619	-2.85592351298741	-3.19438856931826
Bb	-1.45557481696559	-0.16909230318822	-0.473313010839199
Bb	-0.790674648194315	-1.45387450686348	-2.35680384408173
Bb	-3.22600593976555	-3.68316857021385	-0.284168767124153
Bb	1.55289168414095	-1.73408768533116	-0.826136245460022
Bb	0.919558091654004	-0.626857598180035	-1.12254734513327
Bb	-0.838946505321643	-1.17098364020474	-1.1458299999665
Bb	-4.33242496158099	-2.51486528845277	-0.971801975016873
Bb	-3.5553702575008	-1.41573710939562	-0.366693270265947
Bb	-3.17475265267089	-1.19247079202466	-0.489431422694561
Bb	-3.79371435917083	-4.31006020534439	-1.11802161700631
Bb	-3.81918295080677	-2.86027161404798	-1.09094589601284
Bb	-3.22877749951407	-2.51854037332284	-0.158796128330429
Bb	-4.23424757448846	-3.88557133362161	2.19568956271855
Bb	-3.30412596382366	-5.18584427984847	1.7895558141791
Bb	-4.01116157036505	-4.81955234848214	1.09104765734591
Bb	-3.88329886502894	-3.81730890963654	2.39026224083894
Bb	-4.08202407680279	-3.98751176889202	1.35906502781485
Bb	-4.94026119039548	-3.4787818451612	1.08095408388721
Bb	-3.64598088774315	-4.22846624942388	1.63221015395924
Bb	-4.49623215163432	-3.48194671880611	1.04500112960774
Bb	-3.29438723783099	-5.20677917764307	2.31943945087599
Bb	-4.23996664600285	-3.98910528758649	2.3995209804138
Bb	-1.07591324033616	-1.08885604217205	2.24821694453108
Bb	-1.8215398752227	-2.29333034351717	1.32632477183201
Bb	-0.887740013471267	-1.70274150284197	2.73669965368637
Bb	0.0143588737422513	-0.957413082354753	-1.69601052347574
Bb	-0.438582026226375	-1.75839658328554	0.577332279176405
Bb	-1.30546565462117	-1.38188166221173	-0.275402238134424
Bb	-0.893938742397381	-1.56362255414684	0.535254297520033
Bb	-1.46310945938787	-1.0024108141895	0.780921050351509
Bb	-0.283657046678937	-1.69642545789096	-0.0680006874521438
Bb	-0.571344514883419	-1.37702267968283	1.24337044870888
Bb	-1.86080876864039	-0.859450708356357	0.118658911744309
Hybrid	-0.560461562489839	-1.13219710641314	0.850284797180401
Hybrid	1.0678298135945	-0.958008987075531	-0.554154244413944
Hybrid	1.11914299205326	-0.676099923175787	0.766972508926279
Hybrid	-0.805030461721738	0.34034774798518	-0.408270622950356
Hybrid	1.20710974185052	-2.60090650842877	-0.00812017375123956
Hybrid	2.74693198981071	-2.7116351904211	-2.26717581424196
Hybrid	0.0782341435841508	1.66381647196248	1.07402232109526
Hybrid	0.524329646256276	-0.300929094309172	0.0476438555766407
Hybrid	2.30504291551288	-0.0356526701668302	-1.44926550814098
Hybrid	-0.961588295170901	-3.02915617962442	0.250223737479854
Bv	3.79481802868395	-2.51526593984076	-4.28756087544196
Bv	3.31287013318198	-2.0741493444257	-3.30597984563785
Bv	0.514967550116231	-1.61415498004572	-1.67865378072885
Bv	2.33064075639066	-3.03903352550837	-0.600843839844827
Bv	4.39272484295976	-1.99634576367782	-3.68052286121842
Bv	1.95548326091087	-3.19913520888425	-1.21706781840925
Bv	0.688634468243836	-2.16735437218723	-0.194677148910433
Bv	1.91782396839635	-0.542599148062076	2.37548523207195
Bv	2.08435031284648	-3.64867208746716	1.09731971156501
Bv	3.51543046300758	-2.22771922578543	-3.07192192276871
Bv	2.04308411905005	-2.71366105576392	-1.74376867201833
Bv	3.85066270554835	-3.078616732118	-2.30194663803082
Bv	2.25456409866061	-2.34639053739557	-2.14099588020796
Bv	2.24886548546867	-3.01579583919111	-1.07975715590051
Bv	3.96044213648827	-2.35049119820578	-1.87315323194248
Bv	1.14267671740347	1.30791816013112	3.28829085863615
Bv	1.64104917610832	-1.23133243073266	-0.384409883821115
Bv	1.86643199832576	-1.00980178047027	-0.407098726323242
Bv	1.42766845274374	-2.54824942235726	-0.455125107408738
Bv	2.86056200239596	0.776733028095611	1.23314969787433
Bv	1.7919101755455	-0.760274137036816	-0.46207595996203
Bv	2.57971375464859	-1.68546947807519	0.106798348407489
Bv	1.49000167817932	0.784358760613605	0.635383393812684
Bv	2.44001658708534	0.146642289912099	-1.23117311566965
Bv	1.08591039973636	-0.162181991411104	-2.23361191529721
Bv	0.190612809118956	-0.73202263227823	1.9397104812549
Bv	-0.78870339359	-0.583290763317101	2.39104598624957
Bv	-0.70626361835993	-0.603777398008511	0.935015304785903
Bv	-0.885451633612692	-0.581324202702228	1.67313566534025
Bv	-1.2783864196882	-1.11053375489688	1.76580902014622
Bv	-1.64342167050211	0.240878652328564	2.44418809756066
Bv	-1.71057319960367	0.419792355241544	1.50742686421763
Bv	-0.848939409515232	-0.751471695932981	1.3594108750325
Bv	-0.95642057151714	-0.00772417200185416	1.88479145178794
Bv	-0.0440516743454294	-1.51486857308046	1.69795526325747
Bv	3.31523796120823	-0.210292814560697	1.80677666165865
Bv	2.11670256886794	-2.49309297614944	1.10834962305173
Bv	5.09200838709328	1.22489103014415	9.01056549747097
Bv	3.26526715335242	-0.614931073954084	2.22266144063075
Bv	6.48425401428708	2.07791048455831	10.5590658037187
Bv	6.17691808994577	1.9235014857454	11.5618928128056
Bv	6.23795553955234	0.798399173059917	6.11004858654534
Bv	1.91215761935542	1.04883874066378	6.4462048451311
Bv	6.81549303228273	1.51376459230354	11.2737894625336
Bv	2.9012052343678	-0.767757801754407	4.71080504641902
Bv	3.84119568184939	-0.789513686633637	-1.0756895907055
Bv	5.38884723458879	0.0375355207262047	-3.67587146456436
Bv	2.99817107674251	0.0554666988463369	-3.1511833464935
Bv	5.03459538941989	-0.22851545238779	-0.913659876109378
Bv	2.32136119826038	-2.56425680926318	-1.75673271538723
Bv	2.80028096640038	-1.84815543270101	-1.27906048153422
Bv	1.83393324915477	-1.76958417324961	-1.48258575359095
Bv	2.49456111857912	-1.24741258720876	-0.963439973704738
Bv	2.94165019146381	-2.02877396698872	-0.445532769509021
Bv	2.15616377013747	-1.20654898072595	-0.453366846306427
Bv	2.61349261179724	-0.940640182601313	-1.15576269111082
Bv	3.02291763602348	-0.98707729705432	-1.8675796902088
Bv	4.30737328127979	-0.221616689027592	-0.849342606206507
Bv	5.12871426660212	-1.71169748047069	-1.9928053576638
Bv	4.10196517051114	-2.00298610095153	-2.10851639184219
Bv	1.98527247057888	-0.768953062998882	-1.10204983827422
Bv	4.25184103510212	-1.00495032432318	-2.94873393990774
Bv	4.06236155414684	-0.92985637969089	-1.57455545172172
Bv	4.65026590109883	-1.24589886931318	-1.04847719979561
Bv	4.4325078648966	-1.14207430045584	0.726170415229992
Bv	2.63017276528406	-0.80699083969199	-1.94281876811209
Bv	2.04013632921894	-0.92709417974717	-1.0598324520818
Bv	1.93690264956888	-1.60868090776263	-2.13159157539002

## Sheet: Table S9
Table S9. Cline parameters for all models tested with HZAR package.
Models containing all populations				CFT excluded models
Structure_model	Structure_AICc	mtDNA_model	mtDNA_AICc	Structure_model	Structure_AICc	mtDNA_model	mtDNA_AICc
typM	17.0982503134715	typN	4.8023467989742	fixN	9.6388740886879	typN	4.81192416479082
fixN	17.2567957641043	typM	9.27519328351325	typM	11.2807453470612	typR	9.31005369142583
fixM	17.3270912199982	typL	9.27526791720537	fixM	11.4290384083388	typM	9.31049635876294
optN	17.4689363478745	typR	9.27554670677666	optN	11.9158066044903	typL	9.31146232381959
fixR	17.5889845508306	optN	9.54095506331026	fixL	12.8165041758681	optN	9.54299693201623
fixL	20.7074224467002	typB	14.0566915925896	fixR	12.9542944103403	typB	14.137457213775
optR	20.7111731632302	optM	14.1759125289533	optM	15.8596316603935	optL	14.4018040995229
typB	20.8971575609448	optL	14.2910703647072	optR	15.945005240045	optR	14.4259072450375
typN	20.9538071757668	optR	14.338446598481	fixB	16.1107716255401	optM	14.4306745818188
optM	21.116491557815	NA	NA	optL	16.1946708532193	NA	NA
fixB	21.1342707483138	NA	NA	typB	16.2358217841411	NA	NA
optL	21.7101731797985	NA	NA	typN	17.2059710062494	NA	NA
typL	22.8170278778644	NA	NA	typL	17.2307026298891	NA	NA
typR	23.2008553952329	NA	NA	typR	19.2437142034067	NA	NA
optB	25.3133463055643	NA	NA	optB	20.0774980623552	NA	NA
