# Supplementary material
Source: publisher figshare collection journal article supplement (https://brill.figshare.com/articles/dataset/_/24156075)

**Figure S1.** PCA scatterplot of populations based on microsatellite data. d

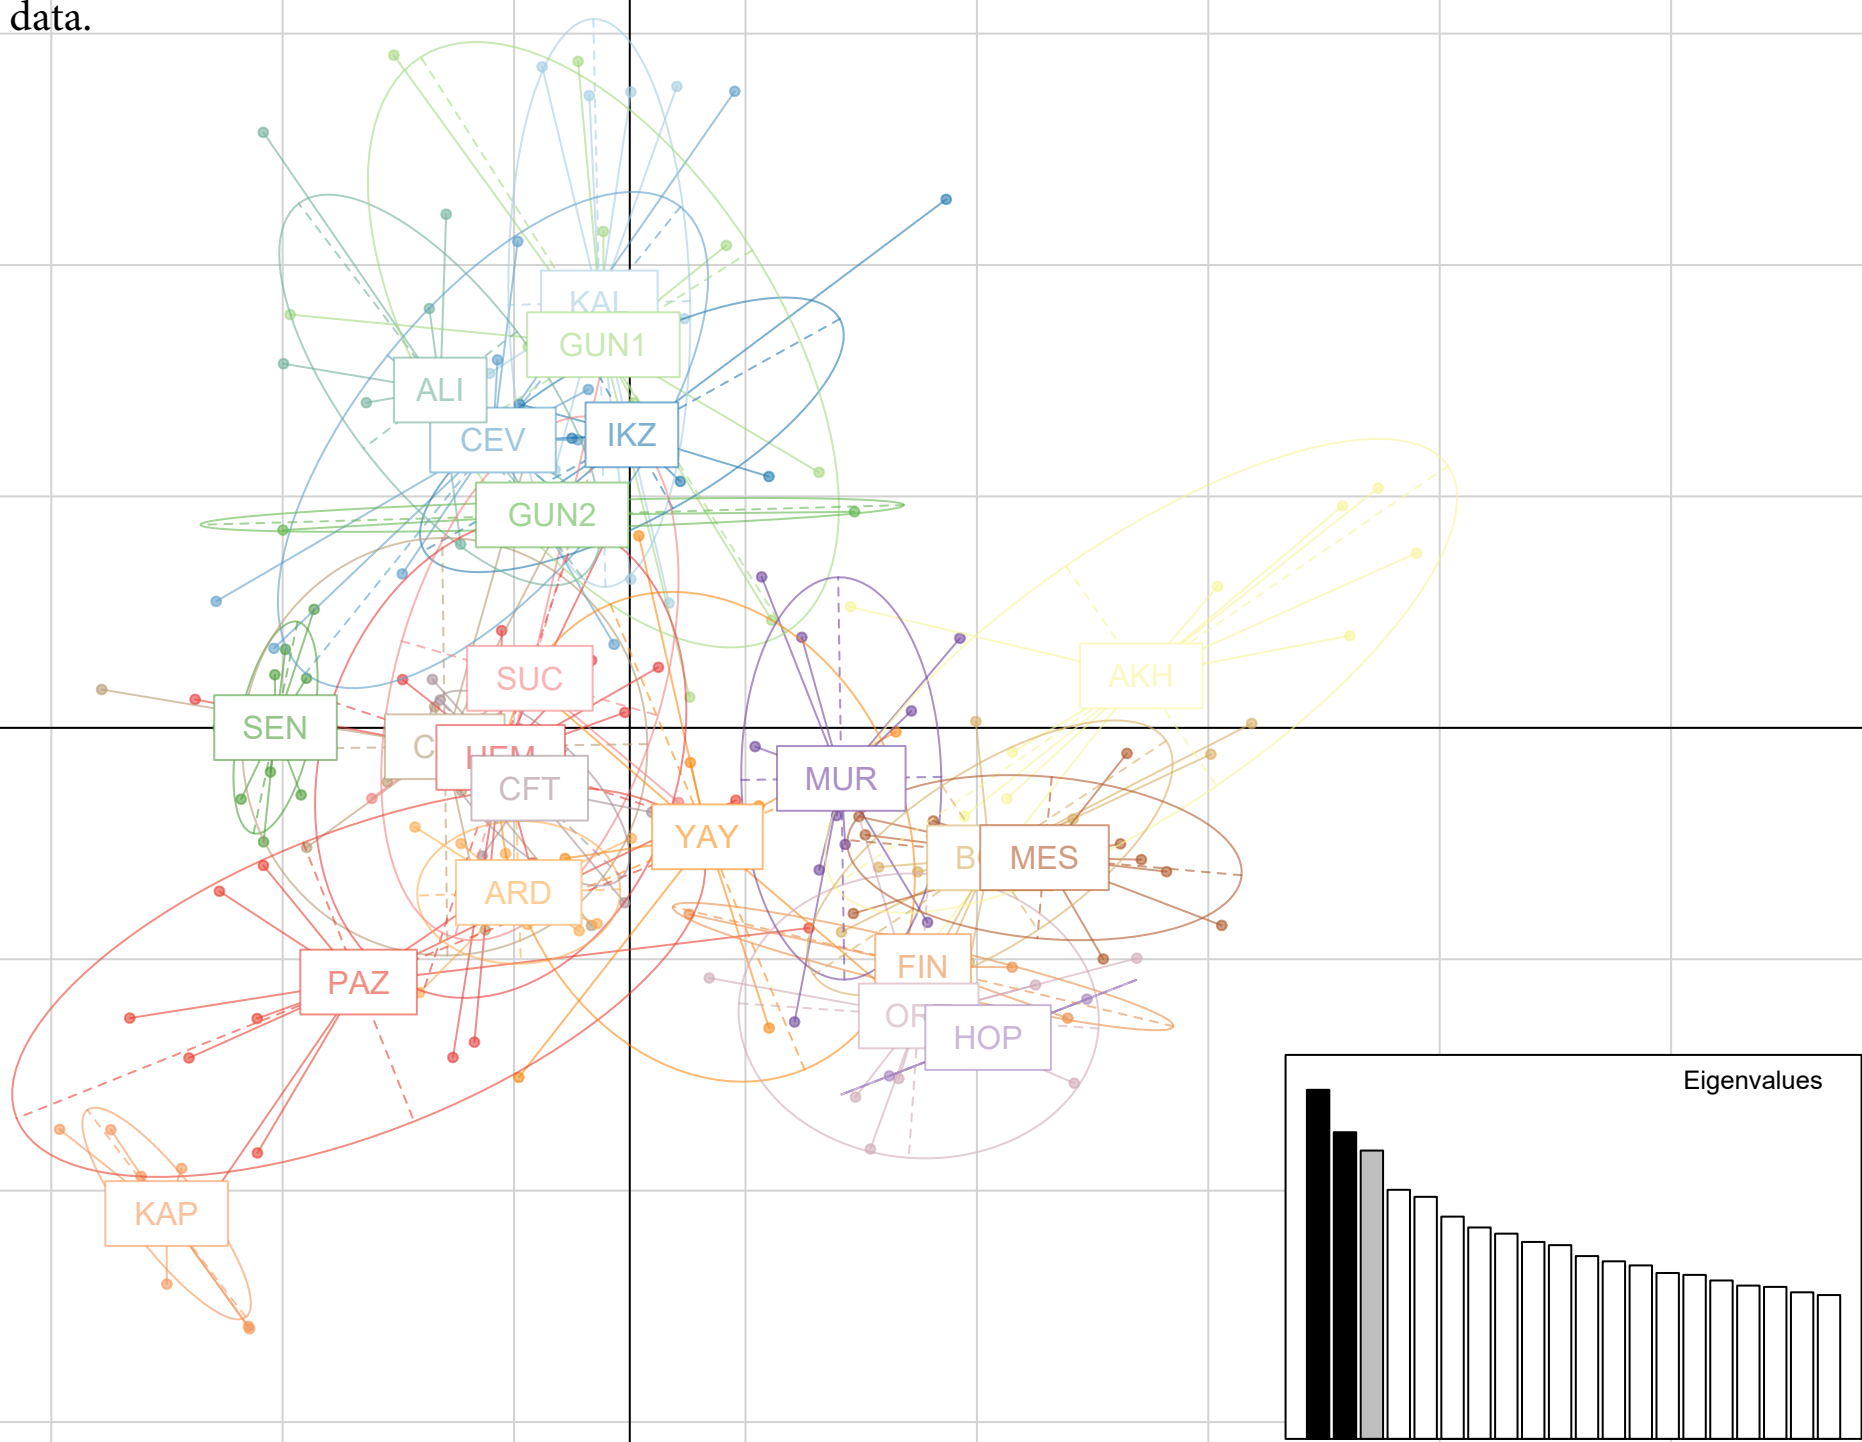

**Figure S2.** Discriminant scatterplots of all populations based on microsatellite data.

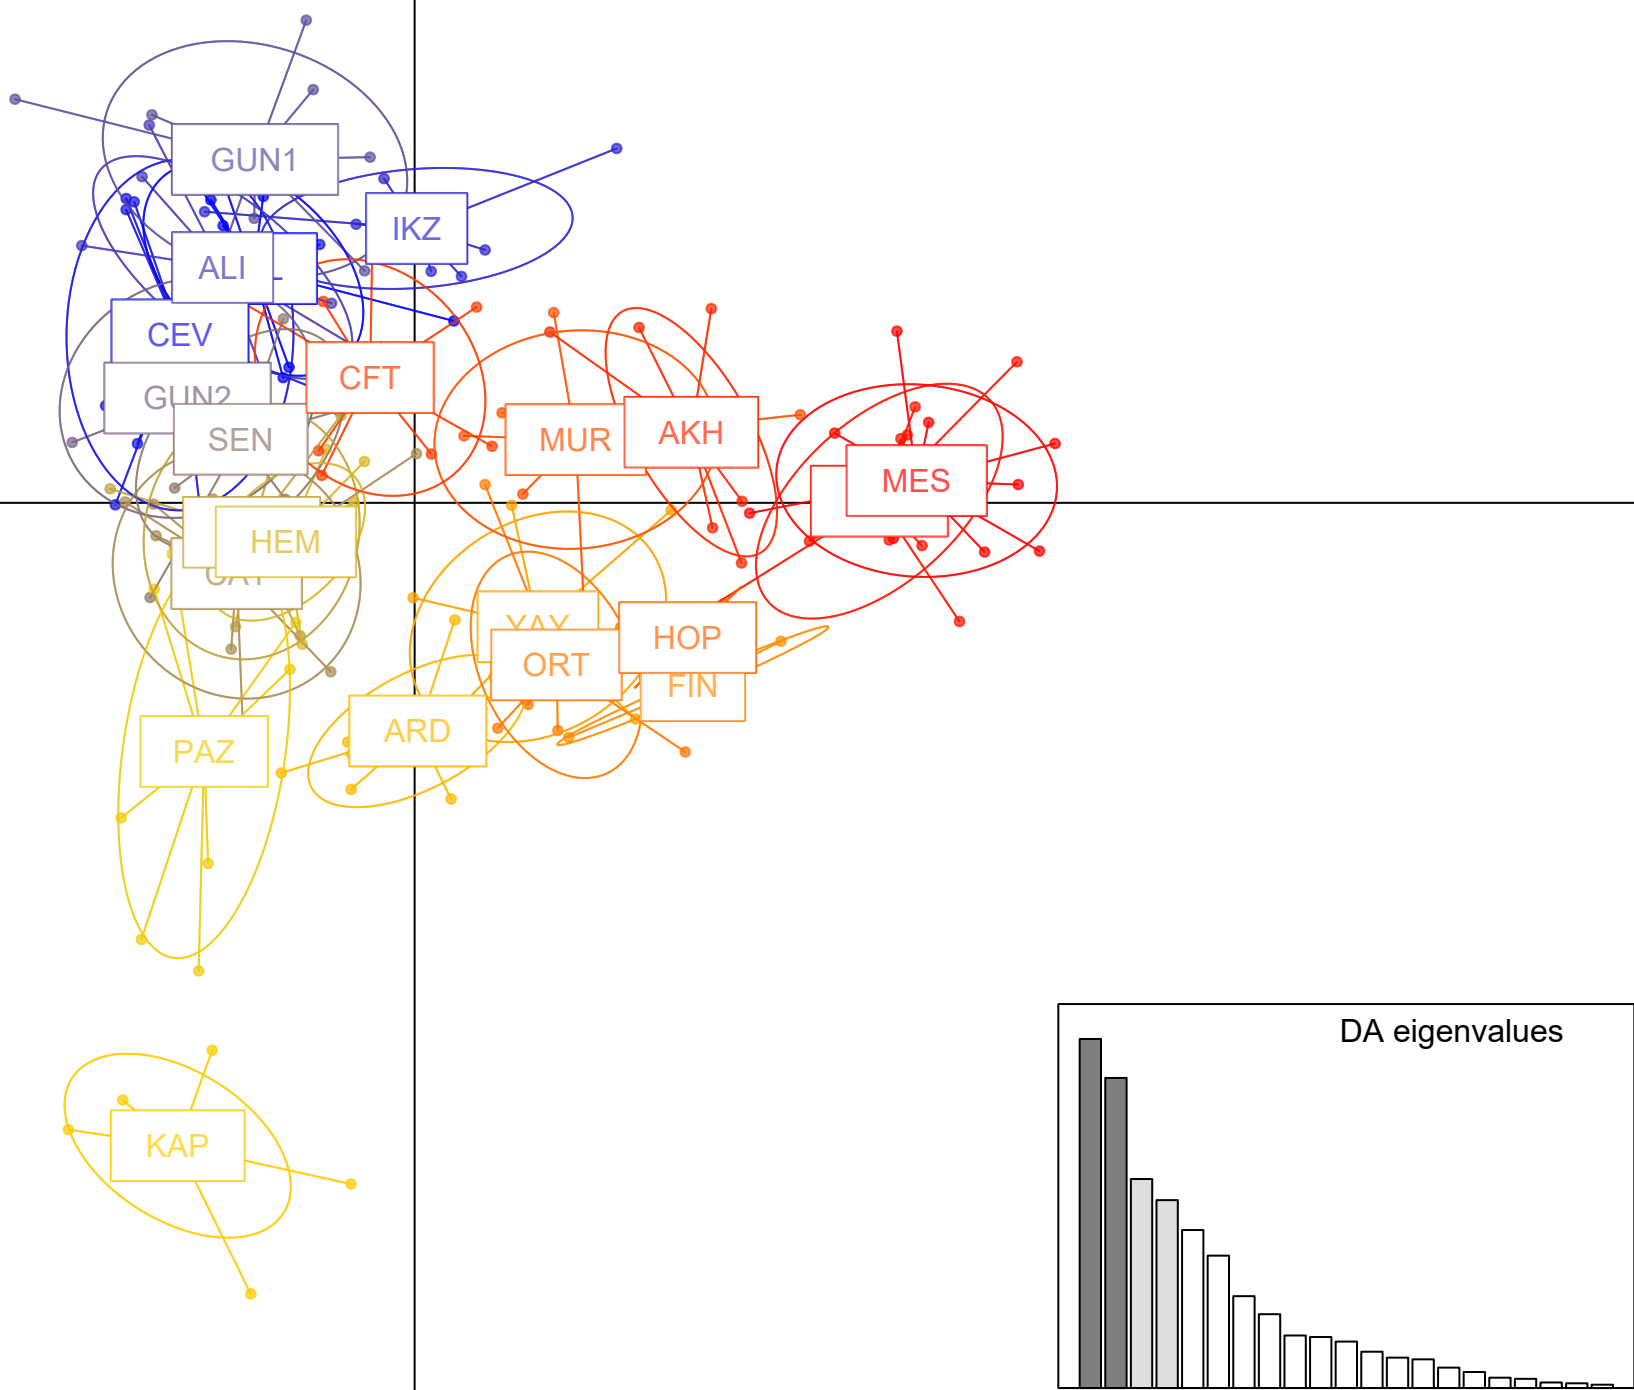

**Figure S3.** Individual membership probabilities to each population based on retained discriminant functions.

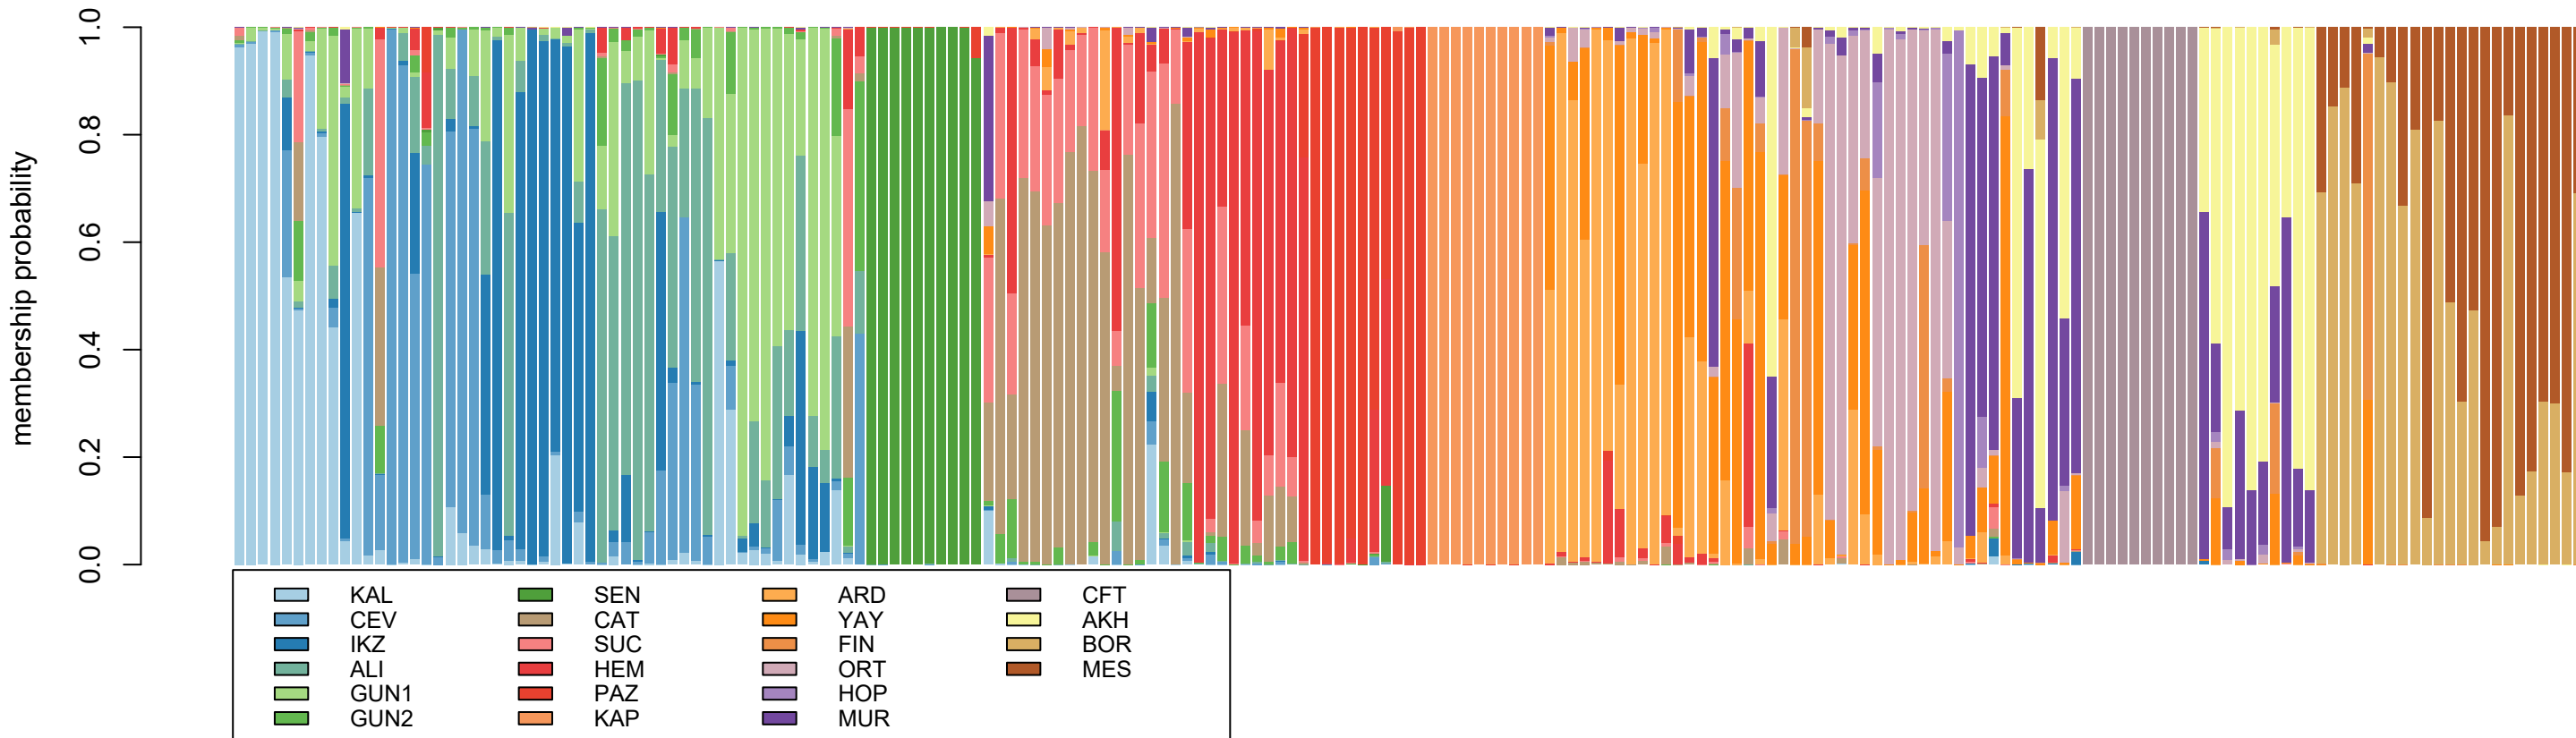



**Figure S5.** Individual membership probabilities to defined STRUCTURE groups based on retained discriminant functions.

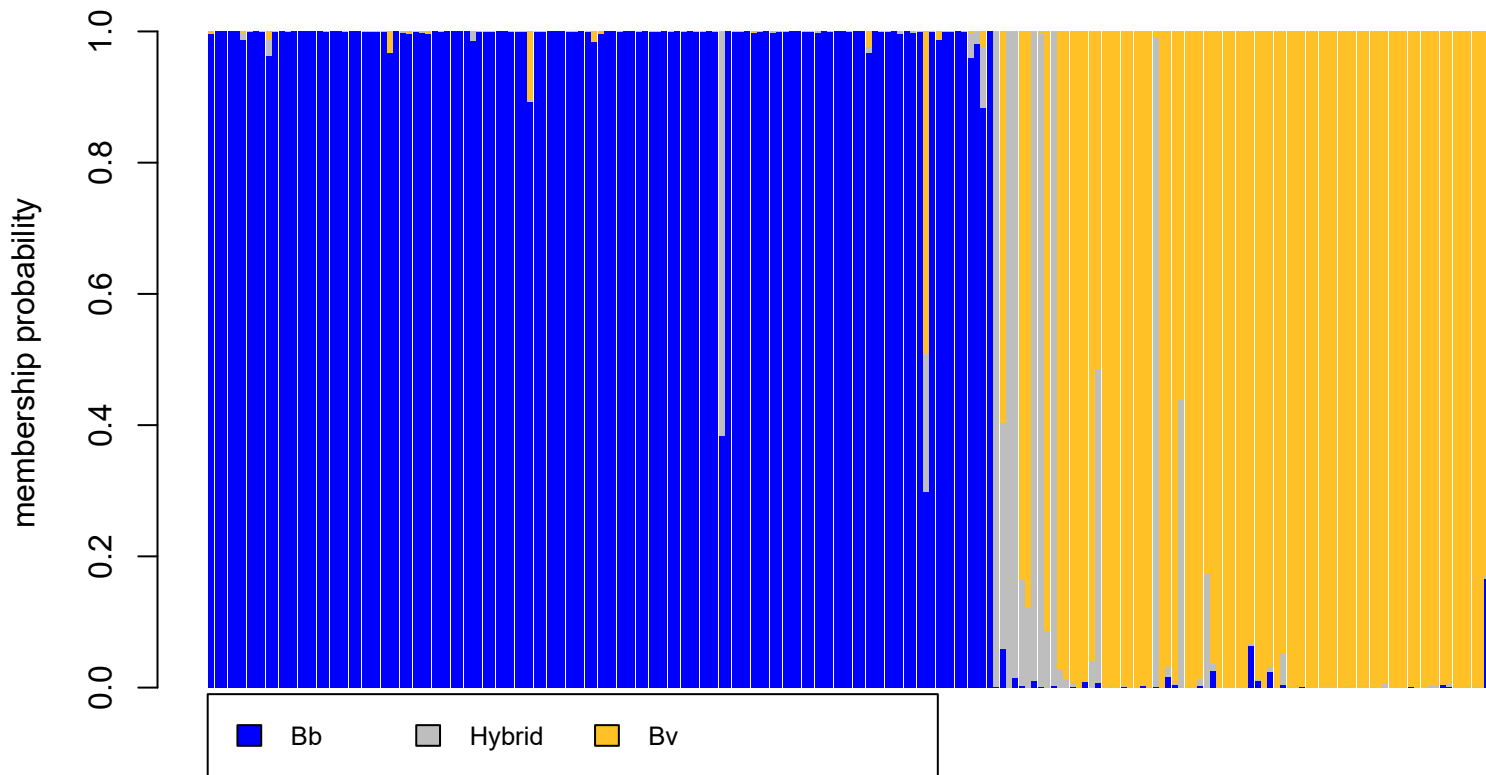

**Figure S6.** Assignment plot from discriminant analysis of principal components (DAPC). Individuals are reassigned to these pre-defined groups (STRUCTURE analysis) based on the DAPC model with 40 principal components. The color gradient varies from red (1) to white (0), representing membership probabilities to appointed populations.

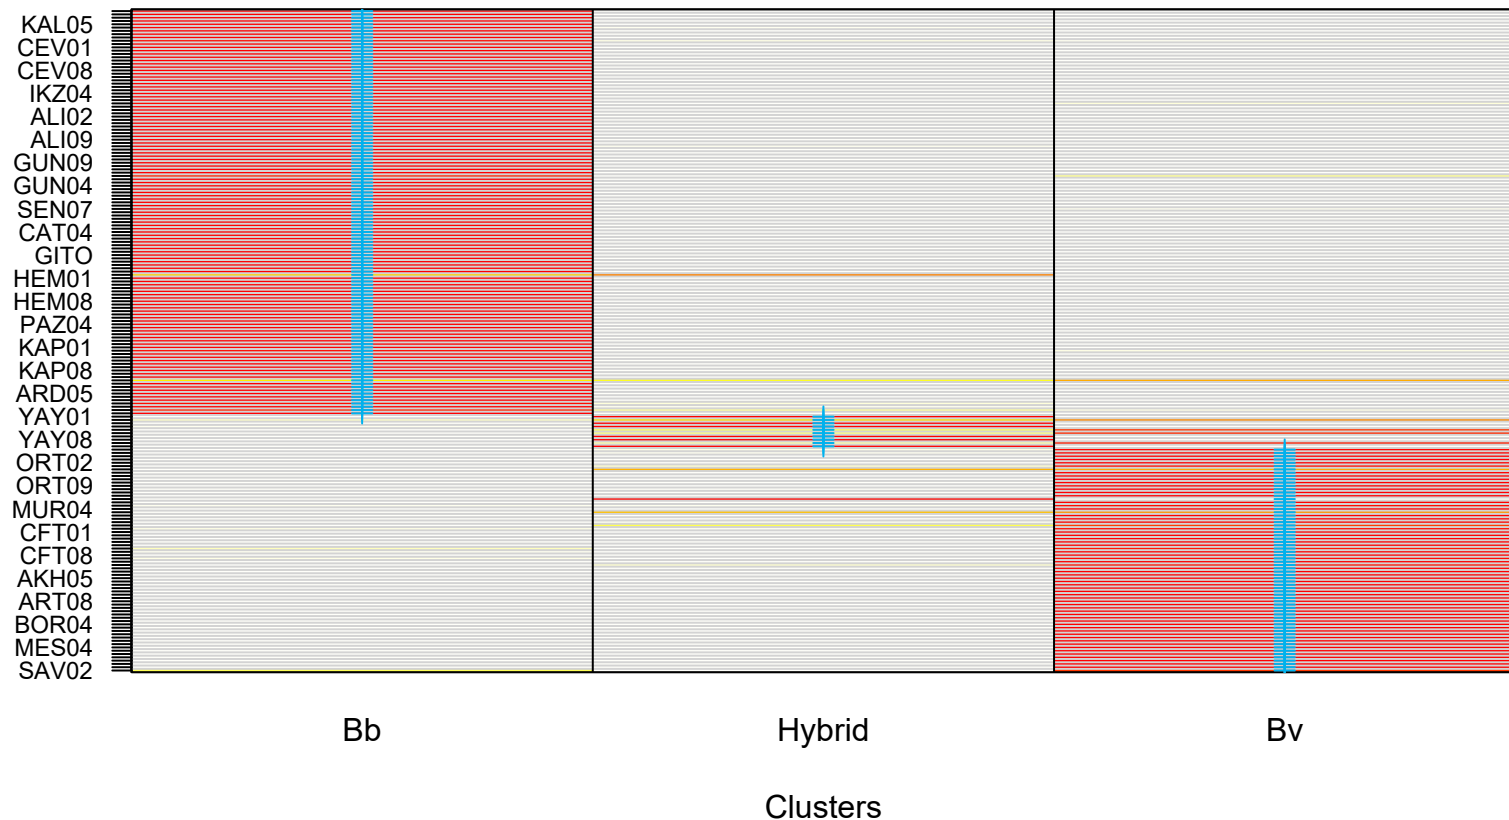

Supplement: Supplementary file 1 [file 1]
