# Supplementary material
Source: publisher figshare collection journal article supplement (https://brill.figshare.com/articles/dataset/_/24156075)
Supplement: Supplementary file 2 [file 1]

CLUMPAK main pipeline - Job 1675176016 summary

Major modes for the uploaded data:

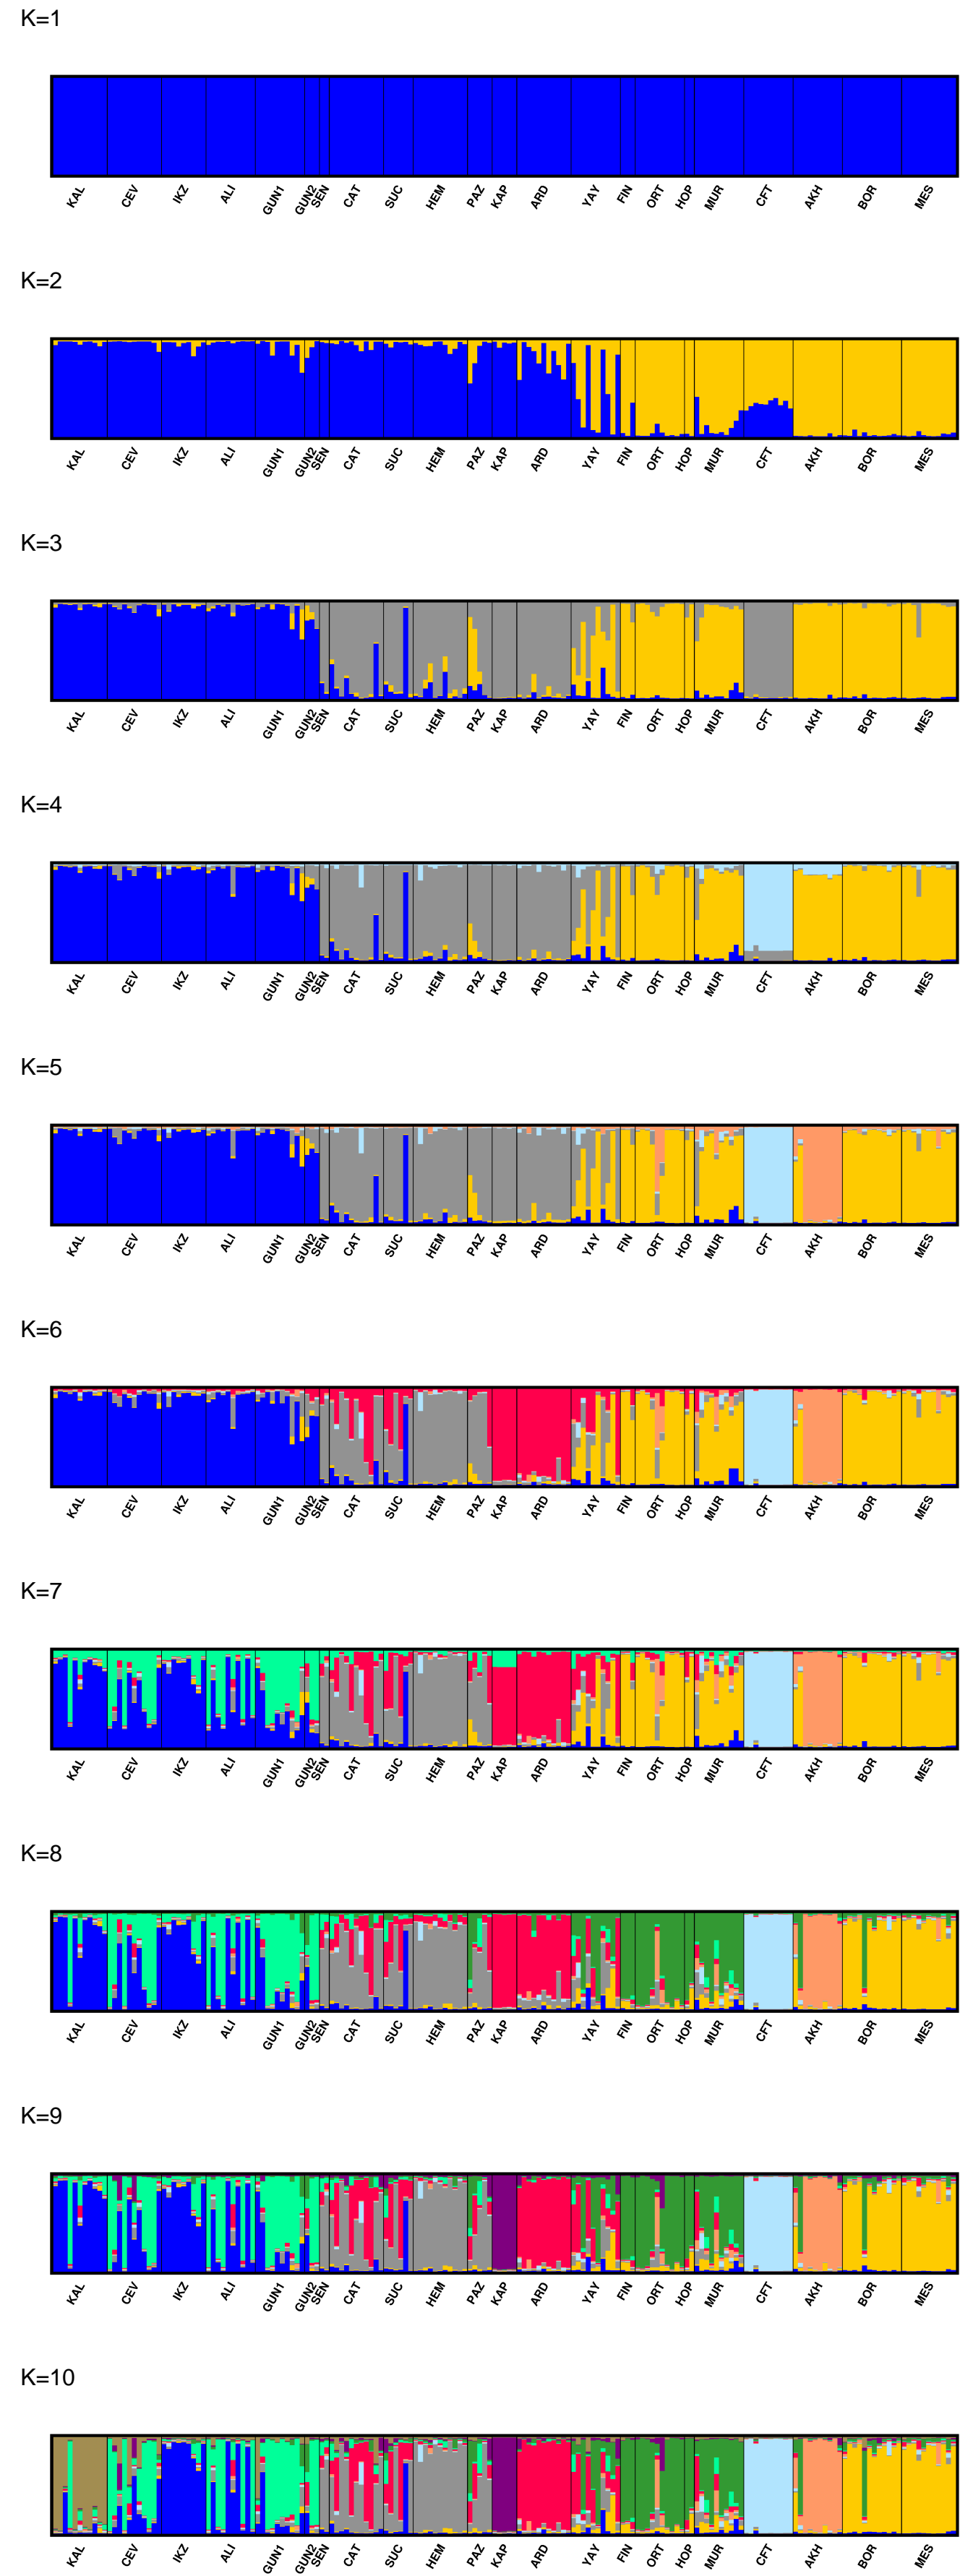

Minor modes for the uploaded data:

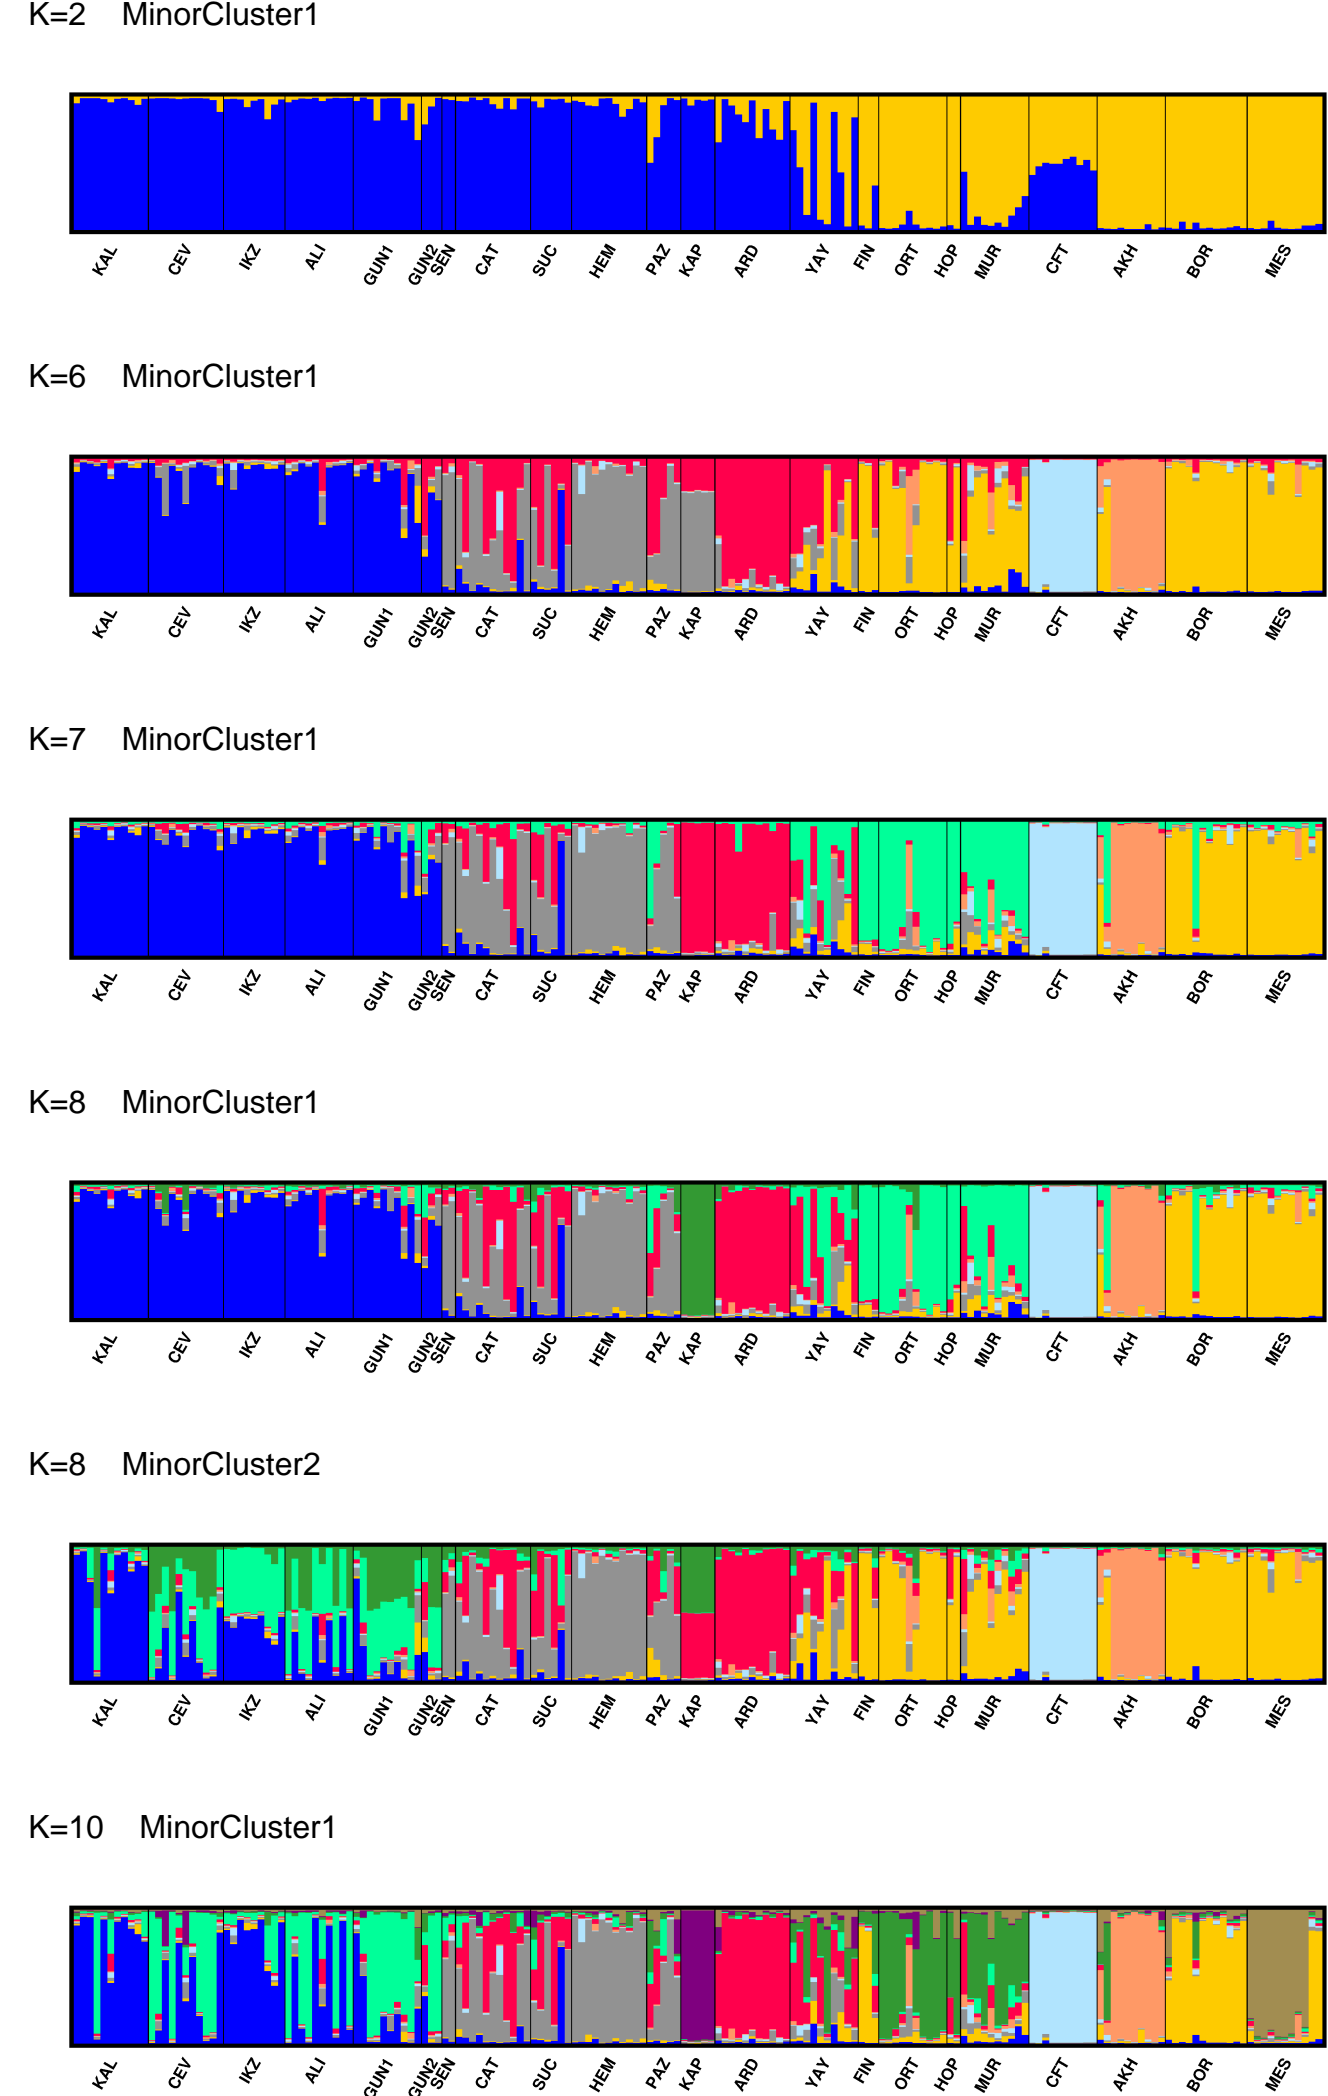

Division of runs by mode:

- K=1 10/10
- K=2 5/10, 5/10
- K=3 10/10
- K=4 10/10
- K=5 10/10
- K=6 7/10, 3/10
- K=7 6/10, 4/10
- K=8 5/10, 3/10, 2/10
- K=9 10/10
- K=10 9/10, 1/10
