# Supplementary material
Source: publisher figshare collection journal article supplement (https://brill.figshare.com/articles/dataset/_/24156075)
Supplement: Supplementary file 3 [file 1]

Genetic data to describe the hybrid zone between *Bufo bufo*  
(Linnaeus, 1758) and *Bufo verrucosissimus* (Pallas, 1814) in  
northeastern Türkiye

Cantekin Dursun<sup>1,\*</sup>, Gregorio Sánchez-Montes<sup>2</sup>, Nurhayat Özdemir<sup>1,3</sup>,  
Serkan Gül<sup>1</sup>, Iñigo Martínez-Solano<sup>2</sup>

1 - Department of Biology, Faculty of Arts and Sciences, Recep Tayyip Erdogan  
University, Rize, 53100, Türkiye

2 - Department of Biodiversity and Evolutionary Biology, Museo Nacional de Ciencias  
Naturales (MNCN-CSIC), c/ José Gutiérrez Abascal, 2, 28006 Madrid, Spain

3 - Department of Biology, Faculty of Science, Karadeniz Technical University,  
Trabzon, 61080, Türkiye

\*Corresponding author; e-mail: [cantekin.dursun@erdogan.edu.tr](mailto:cantekin.dursun@erdogan.edu.tr)

ORCID iDs: Dursun: 0000-0001-7766-1470; Sánchez-Montes: 0000-0001-8100-1061;  
Özdemir: 0000-0002-3880-5846; Gül: 0000-0002-0372-7462; Martínez-Solano: 0000-  
0002-2260-226X

**Supplementary material**
